# Supplementary material for: Topotactic N-doped carbon for efficient oxygen reduction reaction
Source: Royal Society of Chemistry journal article supplement (doi:10.1039/d4ta02349h), 2024-01-01
Supplement: d4ta02349h1.pdf [file d4ta02349h1.pdf]

Supporting Information for

**Topotactic N-doped carbon for efficient oxygen reduction reaction**

Miaosen Yang<sup>a</sup>, Tian Zhang<sup>a,b</sup>, Danni Wang<sup>b</sup>, Yingna Chang<sup>c</sup>, and Guoxin Zhang<sup>b,\*</sup>

a. School of Chemical Engineering, Northeast Electric Power University, Jilin, Jilin 132012, China.

b. College of Energy Storage Technology, Shandong University of Science and Technology, Qingdao, Shandong 266590, China. Email: [zhanggx@sdust.edu.cn](mailto:zhanggx@sdust.edu.cn)

c. Institute of New Energy on Chemical Storage and Power Sources, College of Applied Chemistry and Environmental Engineering, Yancheng Teachers University, Yancheng 224000, China.

## 1. Experimental Section

*2.1 Chemicals and materials:* Polyvinylidenechloride (PVDC, Diofan® P 530, Solvay Specialty Polymers) was purchased from Changzhou Mingshuo Chemical Co., Ltd. Other reagents, carbon nanotube (CNT, purity >99%, used without treatment) was purchased from Shenzhen Suiheng Technology Co., Ltd. Sodium ethoxide (C<sub>2</sub>H<sub>5</sub>ONa, A.R. grade), N-Methyl pyrrolidone (NMP, A.R. grade), pyridine (A.R. grade), pyrrole (A.R. grade), melamine (A.R. grade) were all purchased from Shanghai Macklin Bio-chemical Co., Ltd.

### *2.2 Material characterizations*

X-ray diffraction (XRD) patterns were recorded by a Shimadzu XRD-6000 (CuK $\alpha$  radiation,  $\lambda = 1.5406 \text{ \AA}$ , 40 kV) in the  $2\theta$  range of 5-80°. Raman spectroscopy was obtained from LabRAM ARAMIS Raman spectrometer (HORIBA Jobin Yvon). Scanning electron microscopy (SEM) images were measured on an Apreo S Hivac scanning electron microscope with an accelerating voltage of 20 kV. Transmission electron microscopy (TEM) and high-angle annular-dark-field scanning transmission electron microscopy (HAADF-STEM) images were obtained on an FEI Talos 200S high-resolution transmission electron microscope at an accelerating voltage of 200 kV. X-ray photoelectron spectroscopy (XPS) data were obtained with a Thermo ESCALAB 250Xi spectrometer. The specific surface area and pore structures of the N-doped carbons were studied by the N<sub>2</sub> adsorption-desorption isotherm (Micromeritics ASAP 2460) using a Micromeritics ASAP 2460 instrument at 77 K.

### *2.3 Electrochemical measurements of the oxygen reduction reaction*

The ORR catalytic activity of the N-doped carbon samples is evaluated in a three-electrode setup connecting to an electrochemical workstation (CHI-760E), a Pt wire and a saturated calomel electrode (SCE) are used as the counter and reference electrodes, respectively, and a glass carbon electrode loaded with catalyst ink is used as the working electrode. The catalyst ink is prepared as follows: 5.0 mg of catalyst and 1.0 mg of conductive carbon black are homogeneously dispersed in 30  $\mu\text{L}$  of Nafion (0.5 wt %) and 970  $\mu\text{L}$  of ethanol solution to form a uniform slurry. Before the ORR test, O<sub>2</sub> (99.999%) is purged into 0.1 M KOH electrolyte for at least 30 min to reach O<sub>2</sub> saturation. Commercial Pt/C (20 wt%) was used as a standard catalyst for ORR testing. According to the Nernst equation, all potentials are converted to reversible hydrogen electrode (RHE):

$$E_{RHE} = E_{SCE} + 0.059 V \times pH + 0.241 V \quad (1)$$

where  $E_{RHE}$  is the potential relative to RHE, and  $E_{SCE}$  is the measured potential relative to the SCE reference electrode. To investigate the ORR kinetics, the linear sweep voltammetry (LSV) curves are measured in O<sub>2</sub>-saturated 0.1 M KOH with a scan rate of 5 mV s<sup>-1</sup> at different speeds ranging from 400 to 2025 rpm. Koutecky-Levich (K-L) plots are used to calculate the electron transfer number ( $n$ ):

$$\frac{1}{J} = \frac{1}{J_K} + \frac{1}{J_L} = \frac{1}{J_K} + \frac{1}{B\omega^{1/2}} \quad (2)$$

$$B = 0.62nFC_0D_0^{2/3}\nu^{-1/6} \quad (3)$$

where the  $J$ ,  $J_L$ , and  $J_K$  are the experimental measured current density, the diffusion-limiting current density, and the kinetic current density. Here,  $\omega$  represents the rotating speed (in rpm),  $n$  is the number of transferred electrons for ORR,  $F$  is the Faraday constant,  $C_0$  is the bulk concentration (1.2×10<sup>-3</sup> mol L<sup>-1</sup>),  $D_0$  is the diffusion coefficient of O<sub>2</sub> (1.9×10<sup>-5</sup> cm<sup>2</sup> s<sup>-1</sup>), and  $\nu$  is the kinetic viscosity (0.01 cm<sup>2</sup> s<sup>-1</sup>). The Tafel curves are obtained through the LSV polarization curves according to the following equation:

$$\eta = a + b \log |j| \quad (4)$$

## 2. Supplementary Figures

**A**

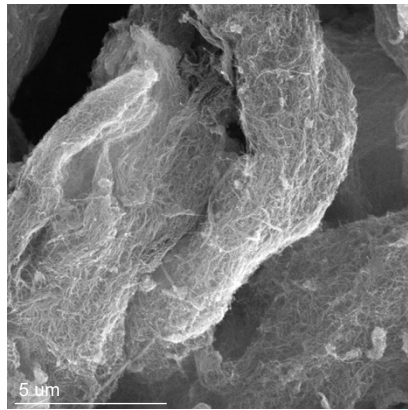

**B**

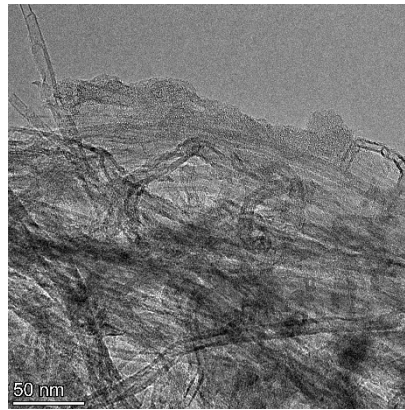

**C**

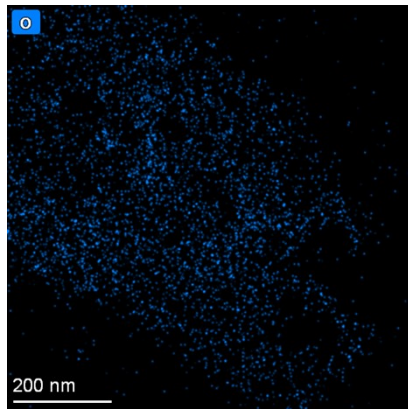

**Figure S1.** (A) SEM image, (B) TEM image, (C) oxygen element mapping image of N<sub>pyrri</sub>-C.

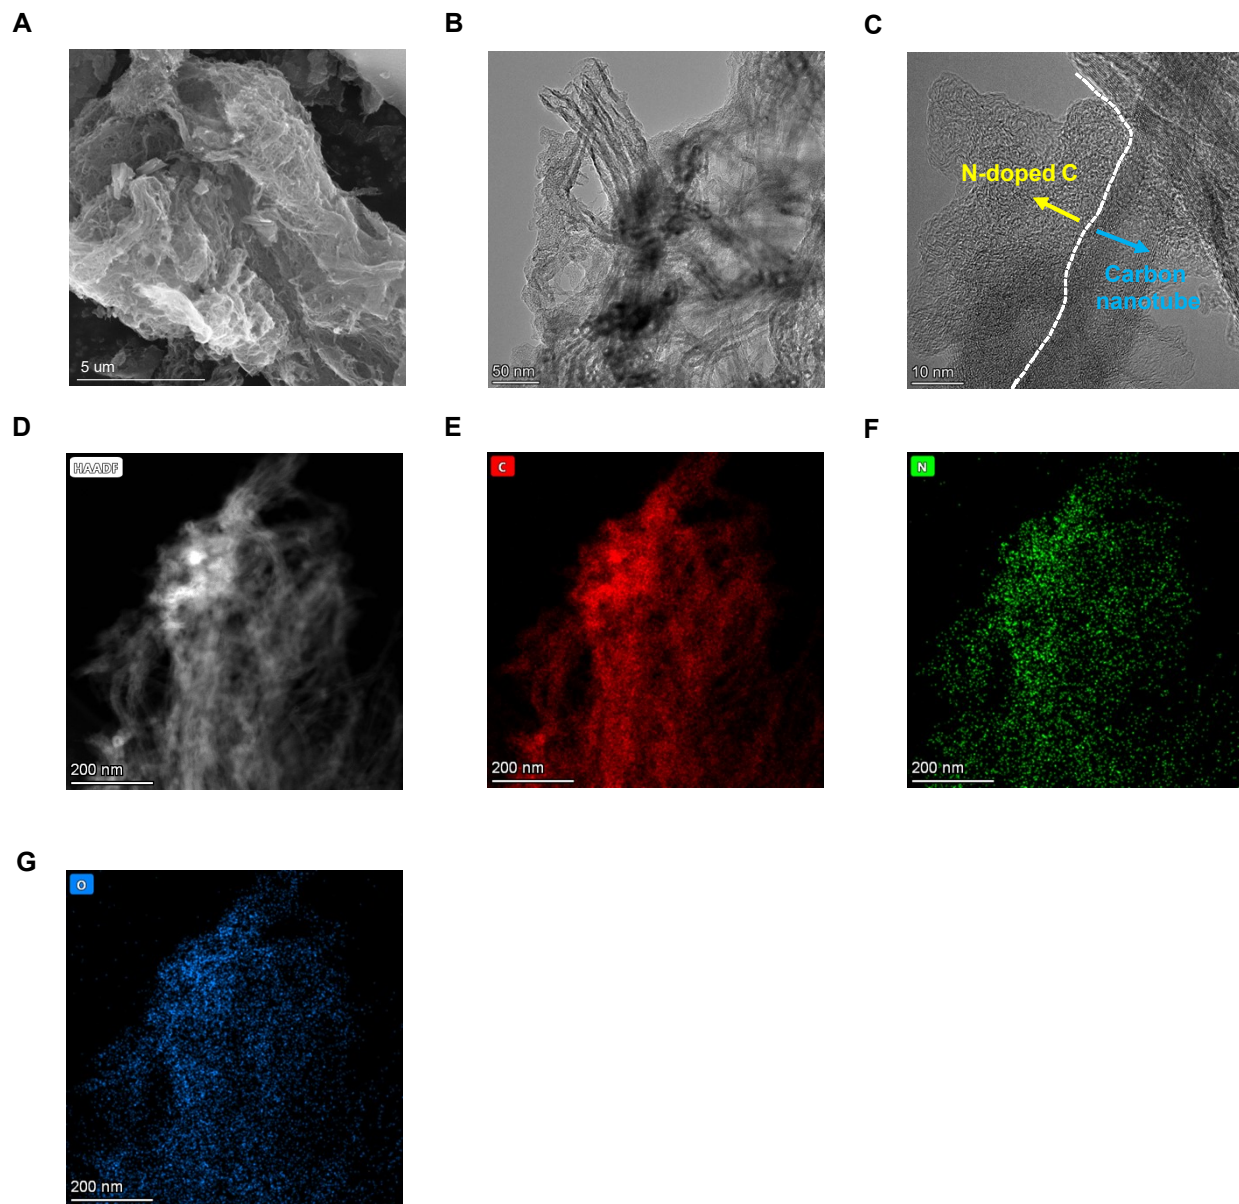

**Figure S2.** (A) SEM image, (B) TEM image, (C) HRTEM image, (D) HAADF-STEM image, (E) carbon, (F) nitrogen, and (G) oxygen element mapping images of  $N_{\text{pyr}}\text{-C}$ .

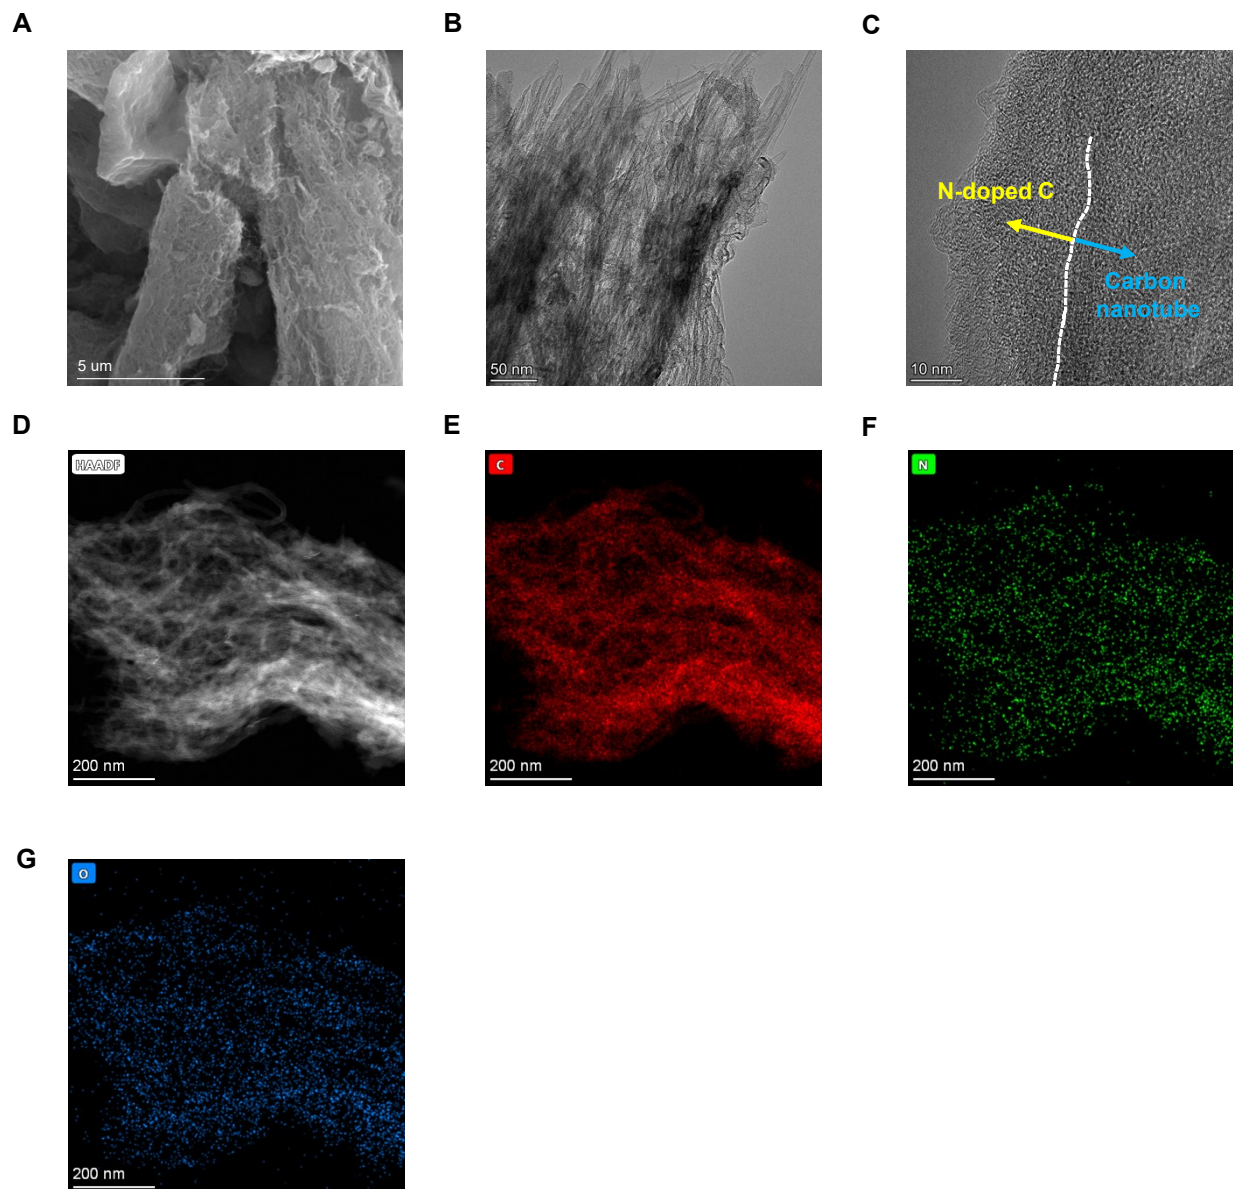

**Figure S3.** (A) SEM image, (B) TEM image, (C) HRTEM image, (D) HAADF-STEM image, (E) carbon, (F) nitrogen, and (G) oxygen element mapping images of  $N_{\text{NMP-C}}$ .

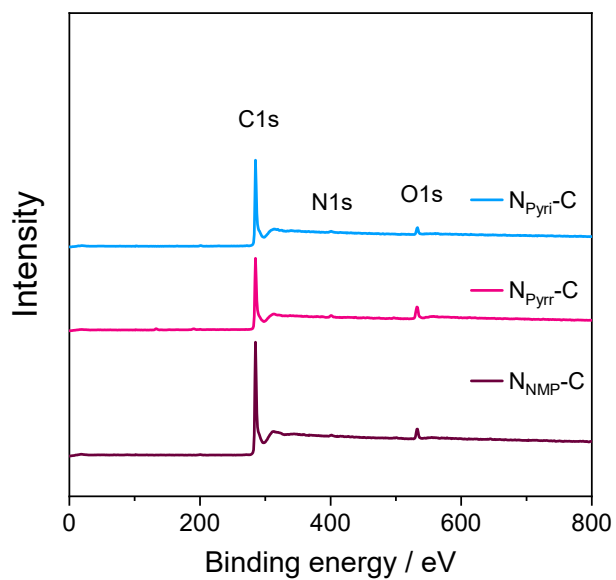

**Figure S4.** XPS survey spectra of  $N_{\text{pyri-C}}$ ,  $N_{\text{pyrr-C}}$ , and  $N_{\text{NMP-C}}$  samples.

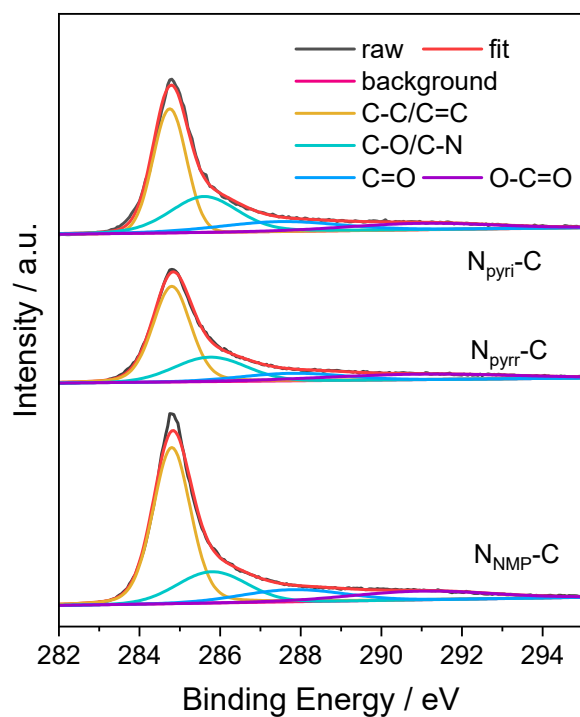

**Figure S5.** XPS C 1s spectra and the deconvoluted curves of  $N_{\text{pyri-C}}$ ,  $N_{\text{pyrr-C}}$ , and  $N_{\text{NMP-C}}$  samples.

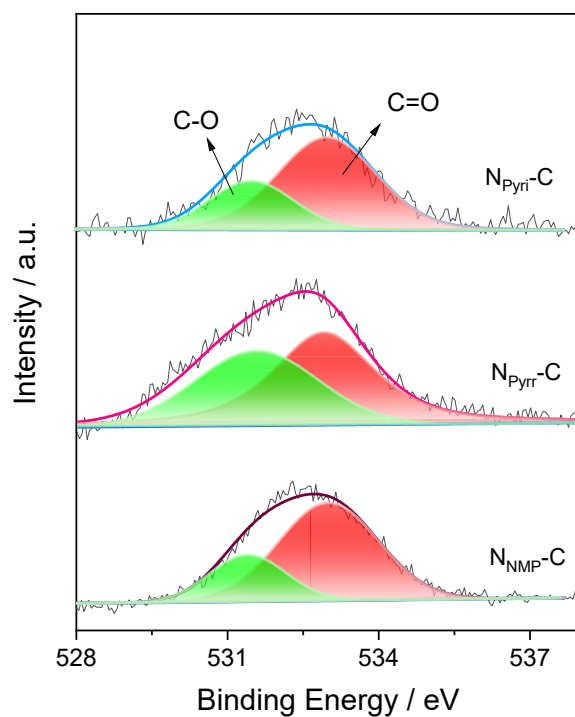

**Figure S6.** XPS O 1s spectra and the deconvoluted curves of  $N_{\text{pyri-C}}$ ,  $N_{\text{pyrr-C}}$ , and  $N_{\text{NMP-C}}$  samples.

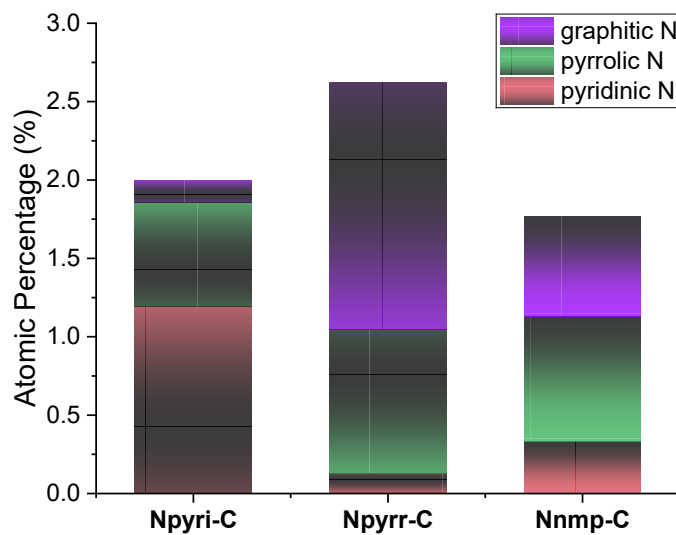

**Figure S7.** The actual atomic percentages of different types of N species in N-C/CNT composites based on XPS elemental analysis.



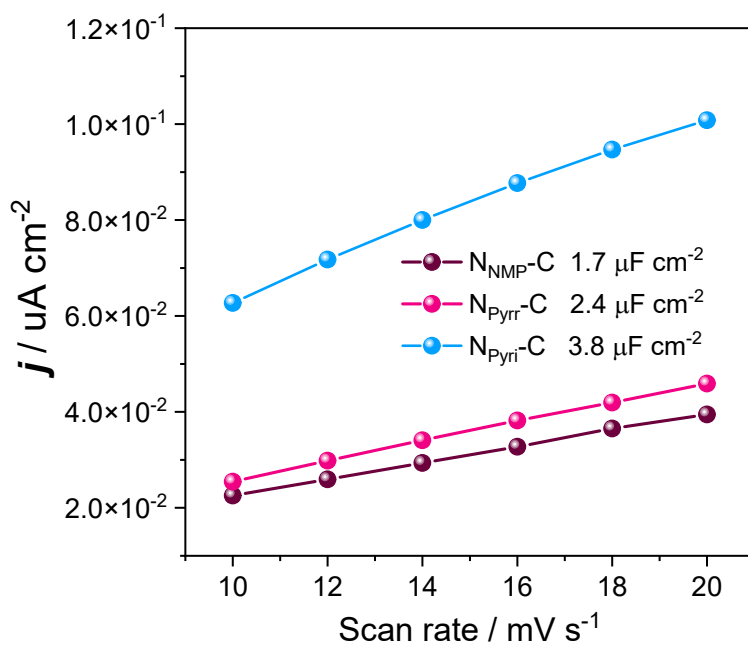

**Figure S8.** Plots of CV peak current density versus scan rate for  $N_{\text{pyri-C}}$ ,  $N_{\text{pyrr-C}}$ , and  $N_{\text{NMP-C}}$ .

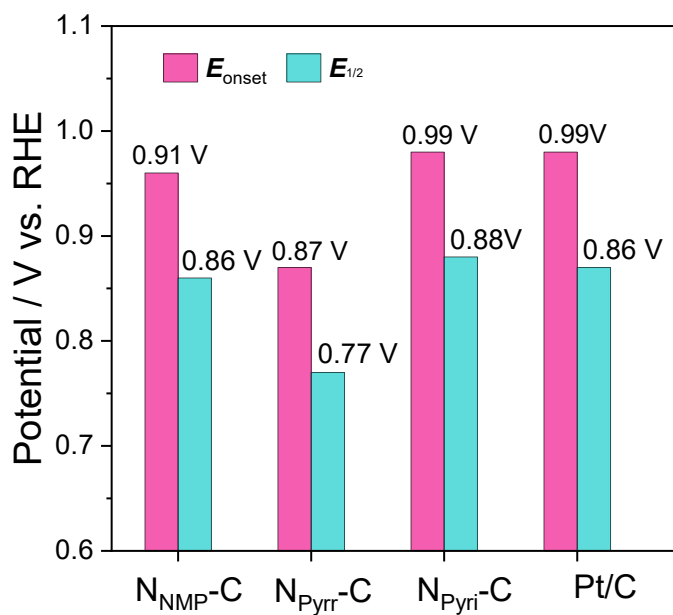

**Figure S9.** Comparisons of onset potential and half-wave potentials of  $N_{\text{pyri-C}}$ ,  $N_{\text{pyrr-C}}$ , and  $N_{\text{NMP-C}}$  using 1600-rpm LSV polarization curves.

**Table S1.** Performance comparison of our N-doped carbon with other metal-free doped carbons reported.

|                     | Electrolyte  | $E_{\text{onset}}$<br>(V) | $E_{1/2}$<br>(V) | Tafel<br>(mV<br>$\text{dec}^{-1}$ ) | Durability (i-t<br>method,<br>retention@time<br>duration) | Reference                                  |
|---------------------|--------------|---------------------------|------------------|-------------------------------------|-----------------------------------------------------------|--------------------------------------------|
| $N_{\text{Pyri-C}}$ | 0.1 M<br>KOH | 0.99                      | 0.88             | 110.3                               | /                                                         | This work                                  |
| $N_{\text{Pyrr-C}}$ |              | 0.87                      | 0.77             | 101.7                               | 98%@6h                                                    |                                            |
| $N_{\text{NMP-C}}$  |              | 0.91                      | 0.86             | 89.4                                | /                                                         |                                            |
| NC-6                | 0.1 M<br>KOH | 0.87                      | 0.81             | /                                   | 94%@4h                                                    | Nano-Micro<br>Lett. (2018) 10:<br>29       |
| NPCS-<br>900        | 0.1 M<br>KOH | 0.99                      | 0.87             | /                                   | 16 mV $E_{1/2}$ loss after<br>5000 cycles                 | J. Mater. Chem.<br>A, 2021, 9:<br>5751     |
| NDC1000             | 0.1 M<br>KOH | 0.96                      | 0.86             | /                                   | /                                                         | Angew. Chem.<br>2020, 132(29):<br>12097    |
| NPCNF-<br>O         | 0.1 M<br>KOH | 0.98                      | 0.85             | 66                                  | 90%@6.9h                                                  | ACS Catal.<br>2022, 12(7):<br>4002         |
| N-CNSP              | 0.1 M<br>KOH | 0.96                      | 0.85             | 58                                  | 95%@16.7h                                                 | Energy Storage<br>Mater 2020, 27:<br>514   |
| NCF                 | 0.1 M<br>KOH | 1.00                      | 0.86             | 57                                  | 88.9%@24h                                                 | Adv. Funct.<br>Mater. 2021,<br>31, 2103187 |
